# Supplementary material for: Whole-genome sequencing and genetic characteristics of representative porcine reproductive and respiratory syndrome virus (PRRSV) isolates in Korea
Source: Springer Nature journal article supplement (doi:10.1186/s12985-022-01790-6), 2022-04-11

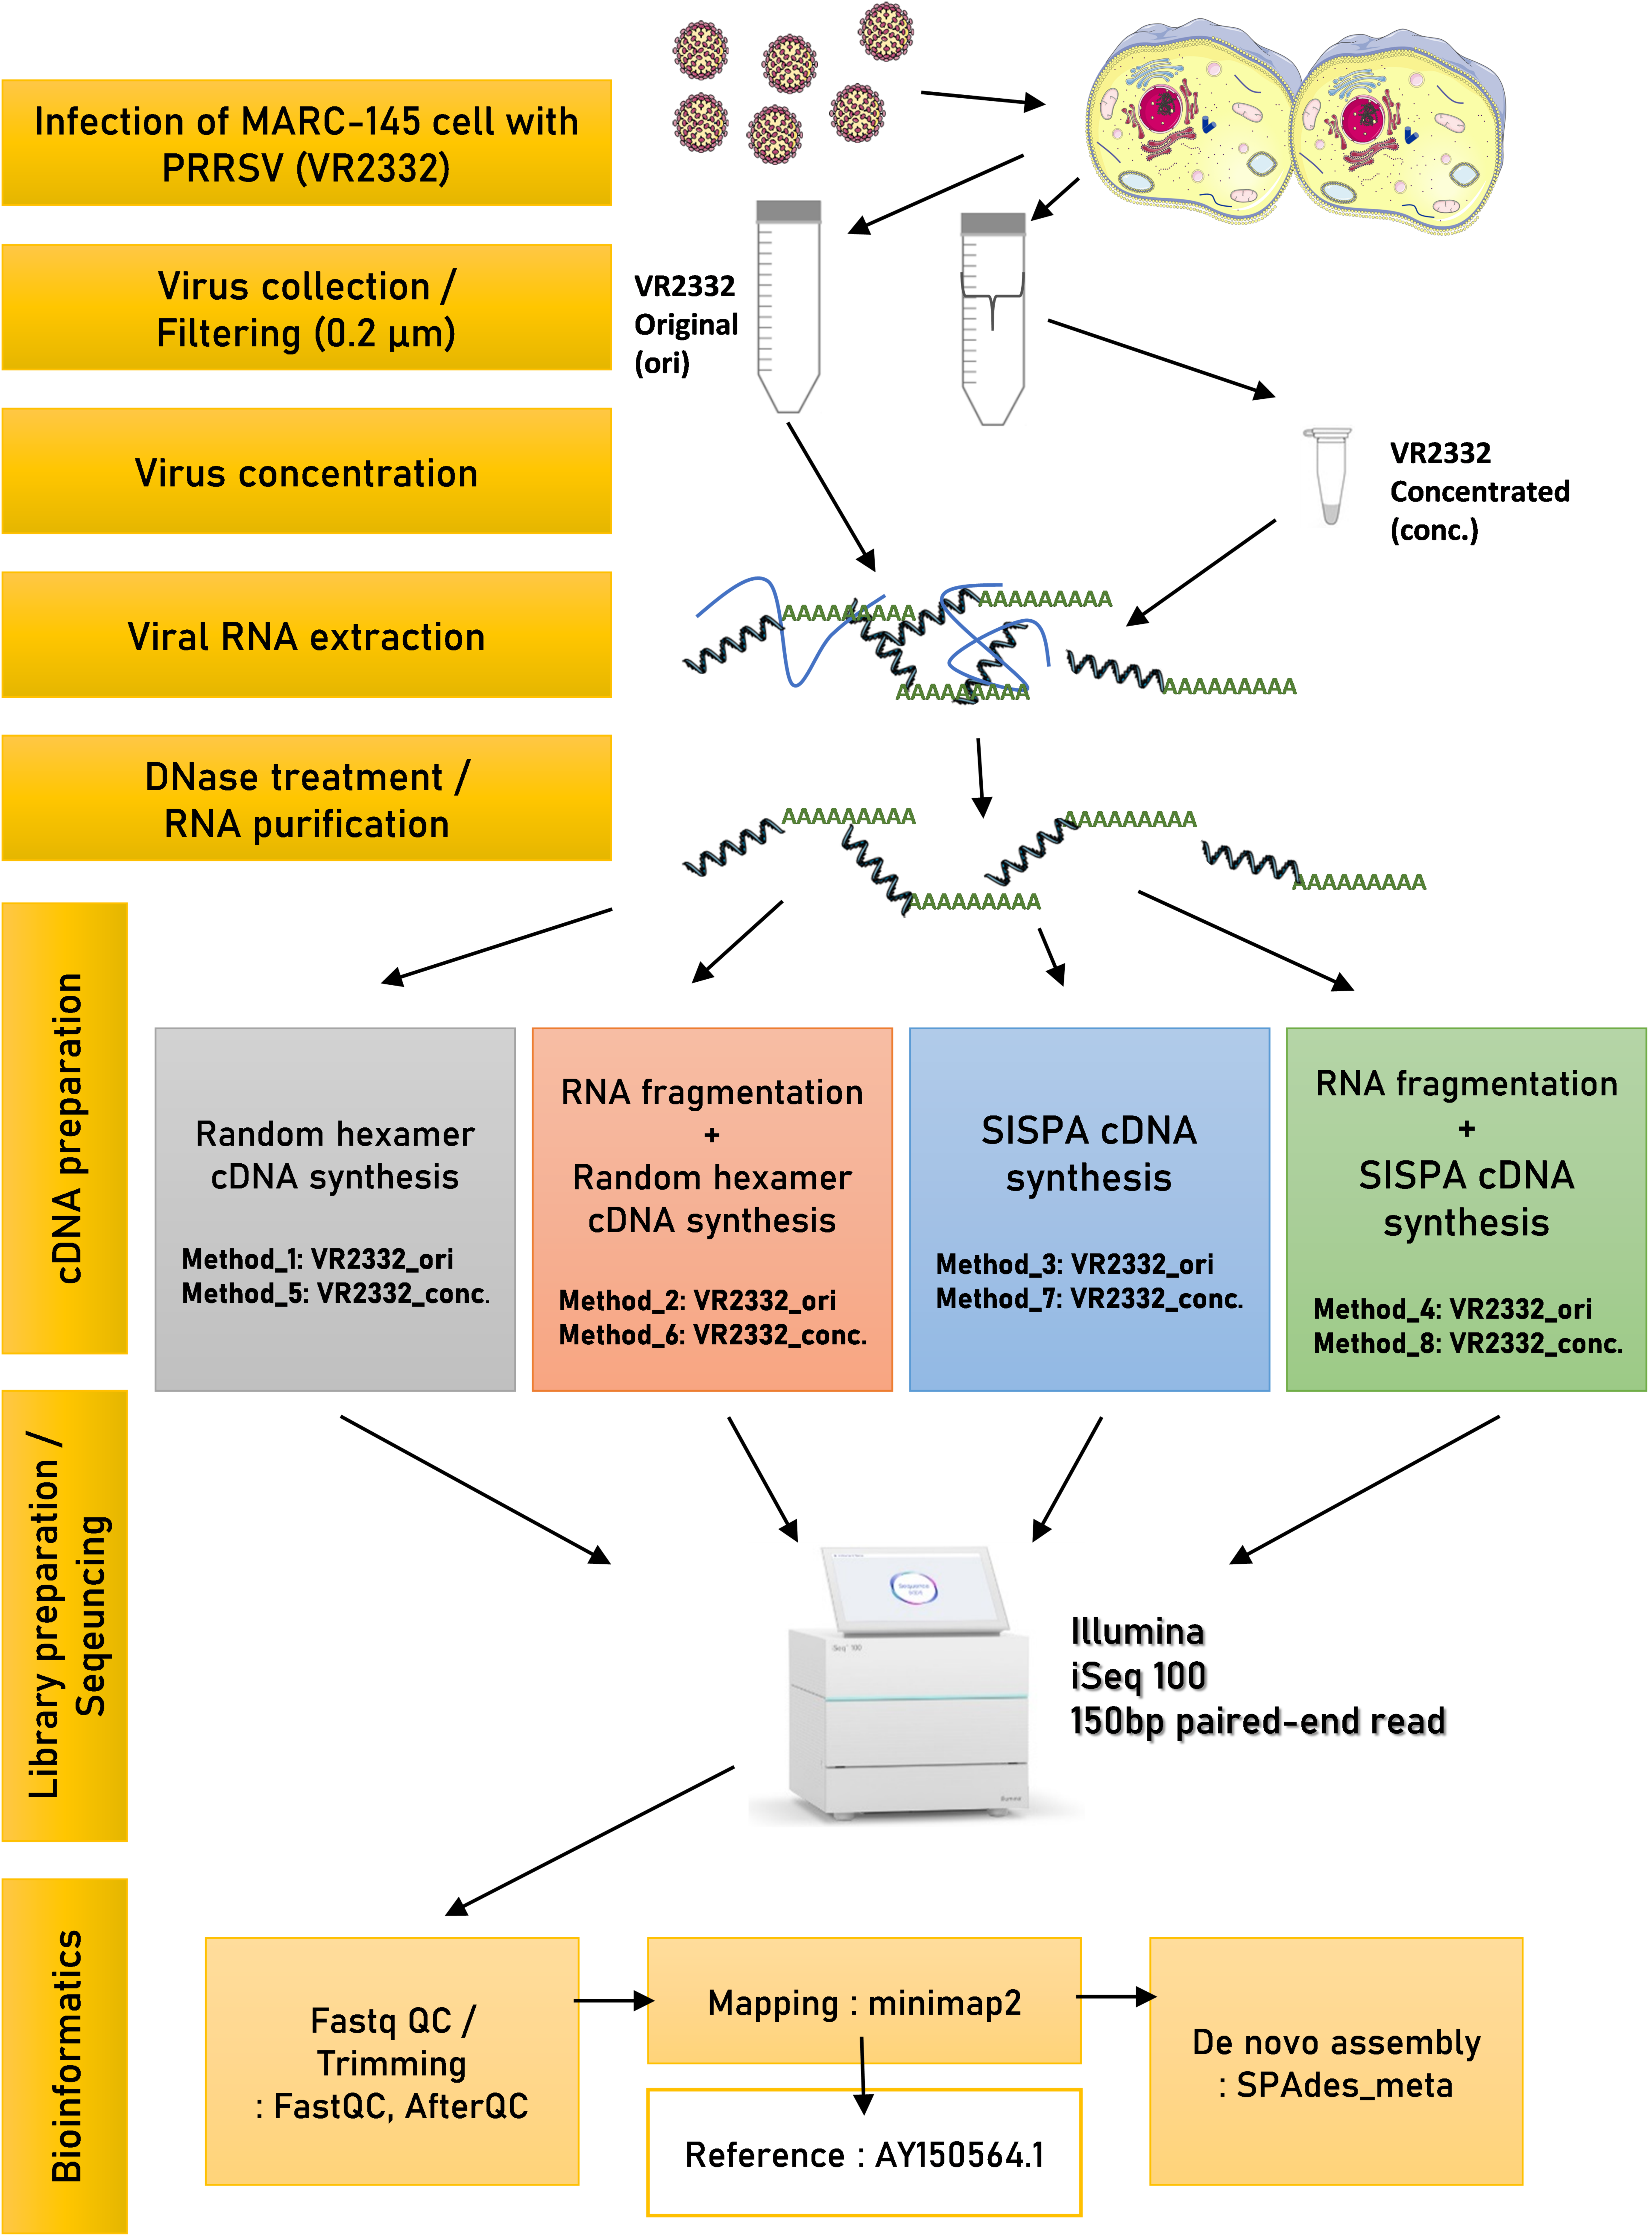

Supplement: MOESM2 [file 20302278]
