# Supplementary material for: Whole-genome sequencing and genetic characteristics of representative porcine reproductive and respiratory syndrome virus (PRRSV) isolates in Korea
Source: Springer Nature journal article supplement (doi:10.1186/s12985-022-01790-6), 2022-04-11
Supplement: MOESM6 [file 20302278]

# 5'UTR

Misassembled region

5'UTR

5'UTR

Reference  
Method\_1  
Method\_2.1  
Method\_2.2  
Method\_3  
Method\_4  
Method\_5  
Method\_6  
Method\_7  
Method\_8

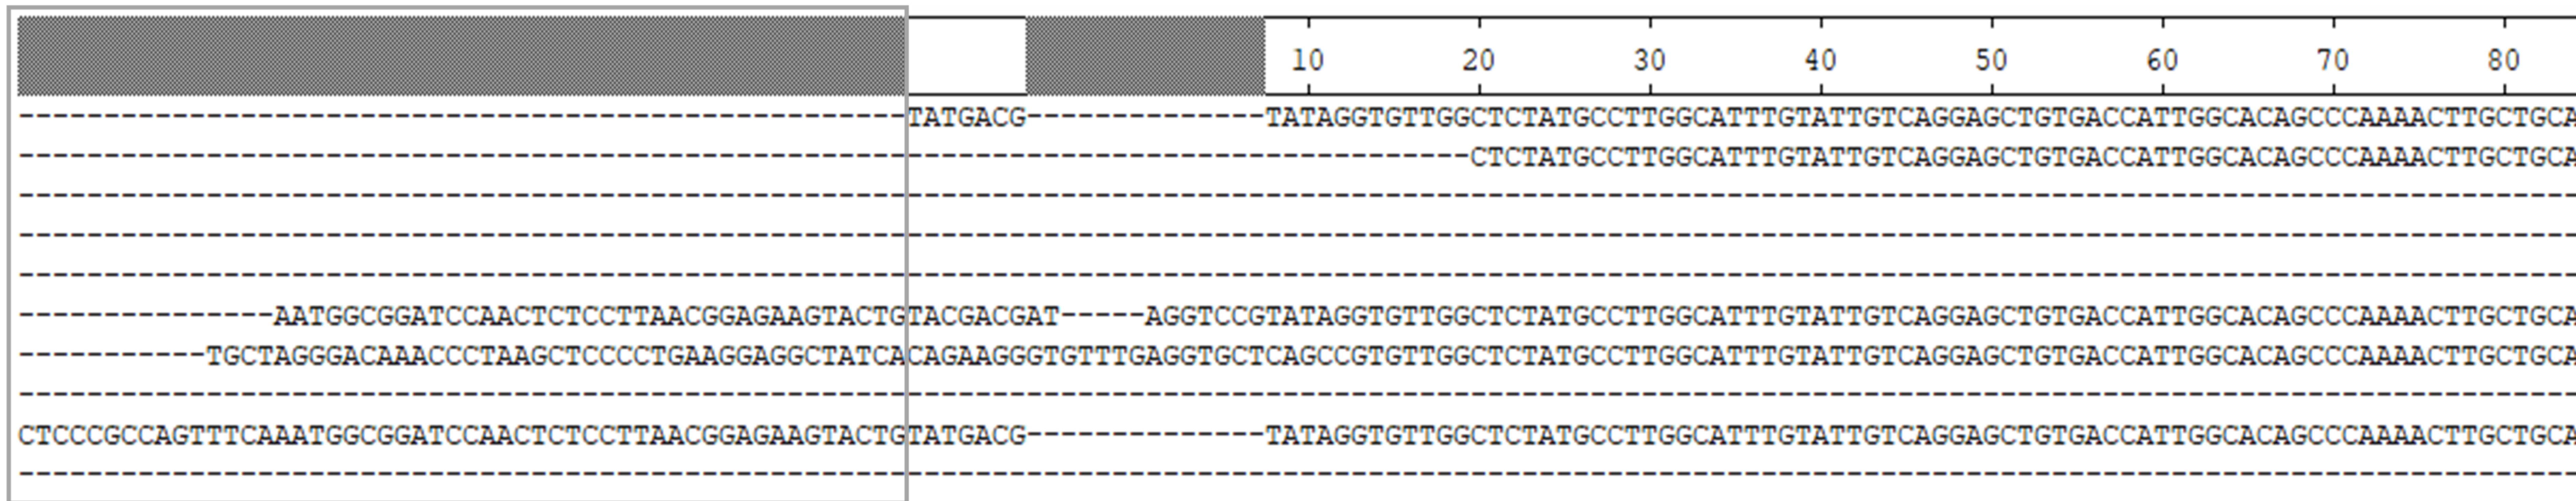

Reference  
Method\_1  
Method\_2.1  
Method\_2.2  
Method\_3  
Method\_4  
Method\_5  
Method\_6  
Method\_7  
Method\_8

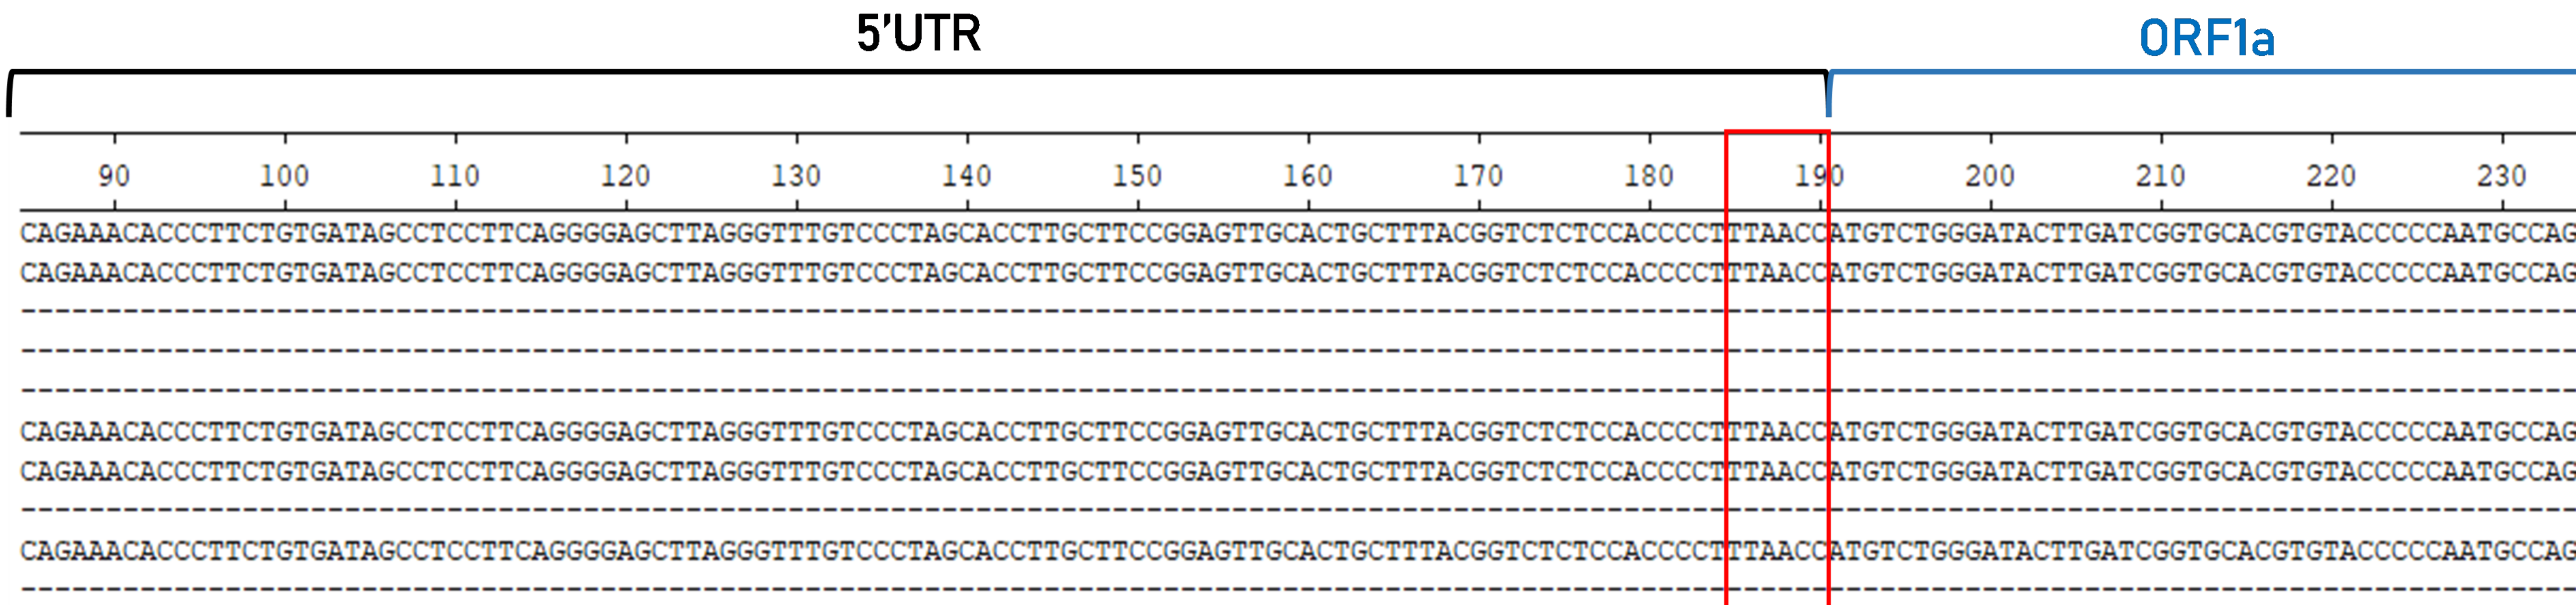

Leader TRS

# 3'UTR

ORF7

3'UTR

Reference  
Method\_1  
Method\_2.1  
Method\_2.2  
Method\_3  
Method\_4  
Method\_5  
Method\_6  
Method\_7  
Method\_8

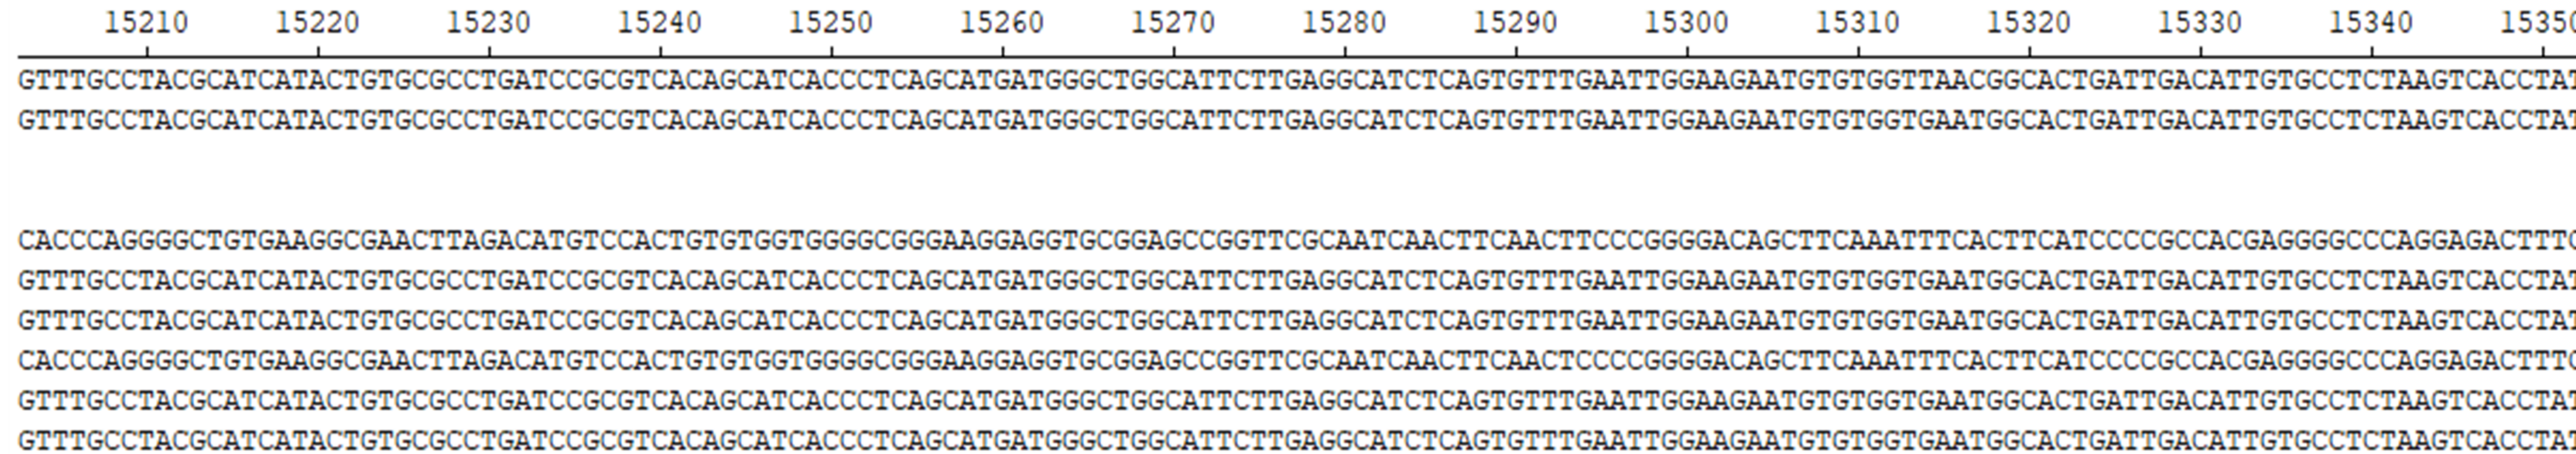

Reference  
Method\_1  
Method\_2.1  
Method\_2.2  
Method\_3  
Method\_4  
Method\_5  
Method\_6  
Method\_7  
Method\_8

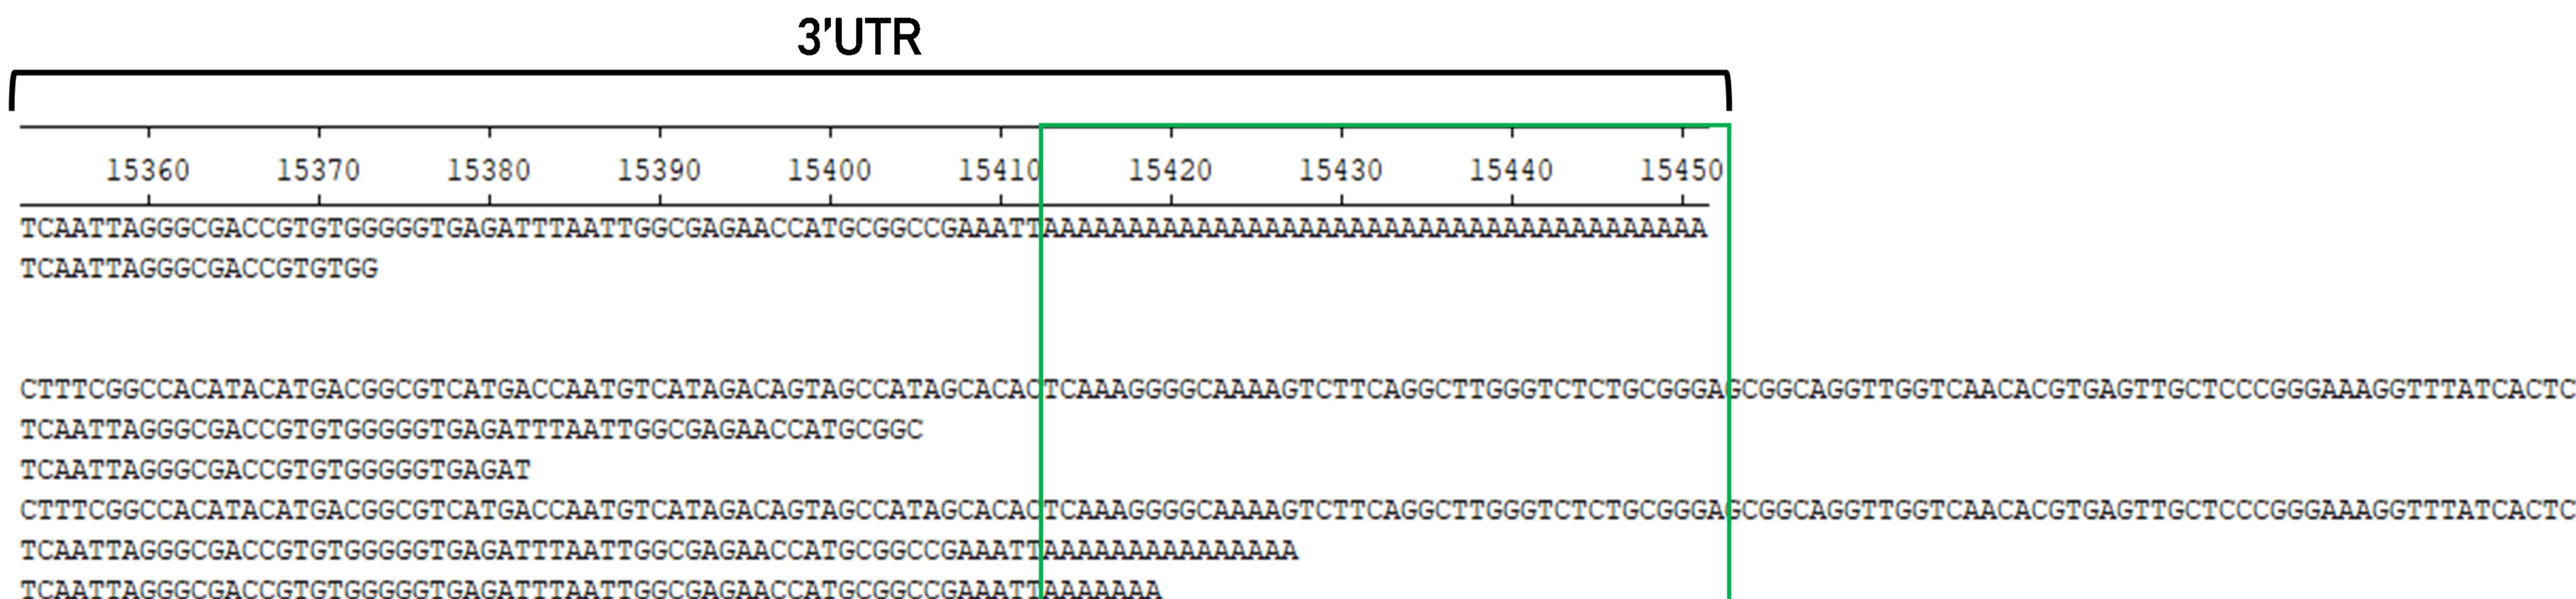

Poly A
