# Supplementary material for: Whole-genome sequencing and genetic characteristics of representative porcine reproductive and respiratory syndrome virus (PRRSV) isolates in Korea
Source: Springer Nature journal article supplement (doi:10.1186/s12985-022-01790-6), 2022-04-11

### Hypervariable Region I

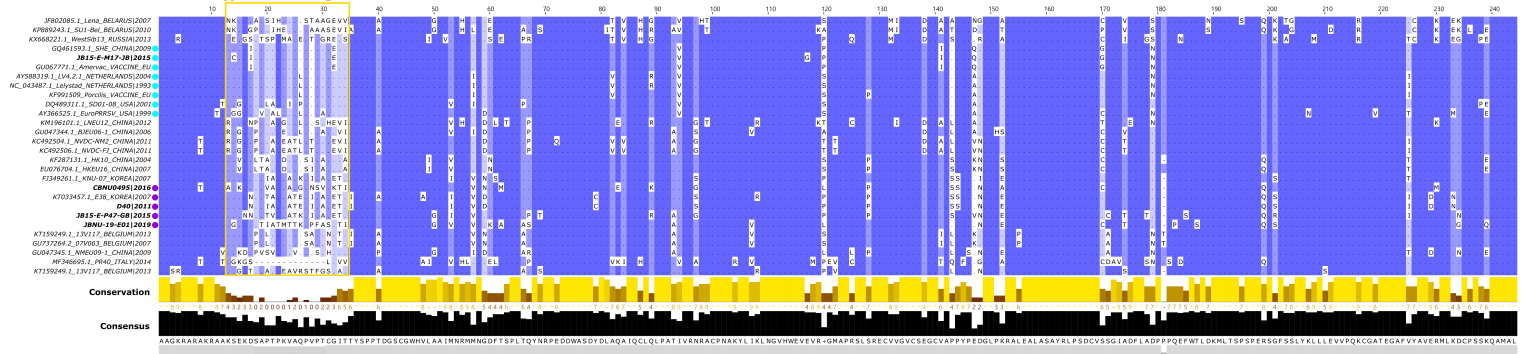

### Hypervariable Region II

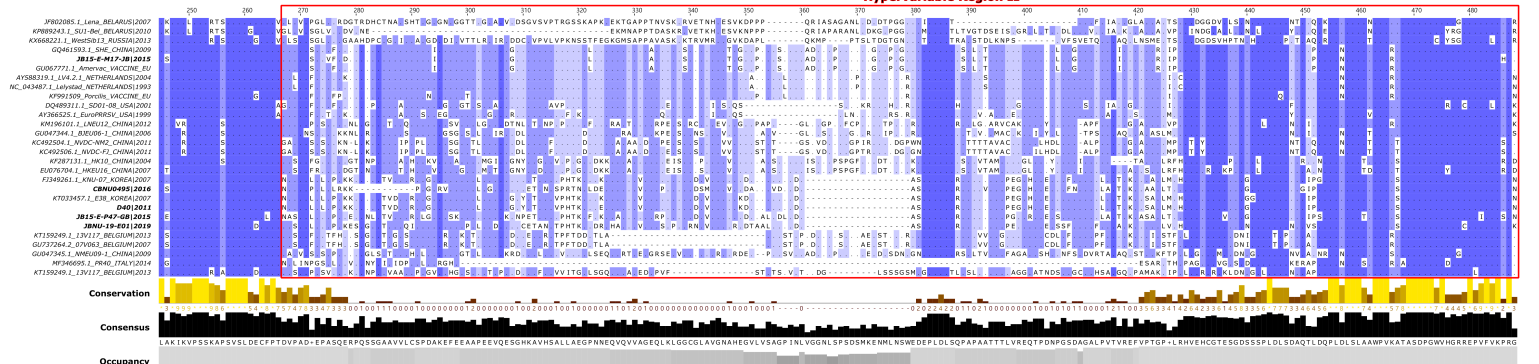

### Hypervariable Region II

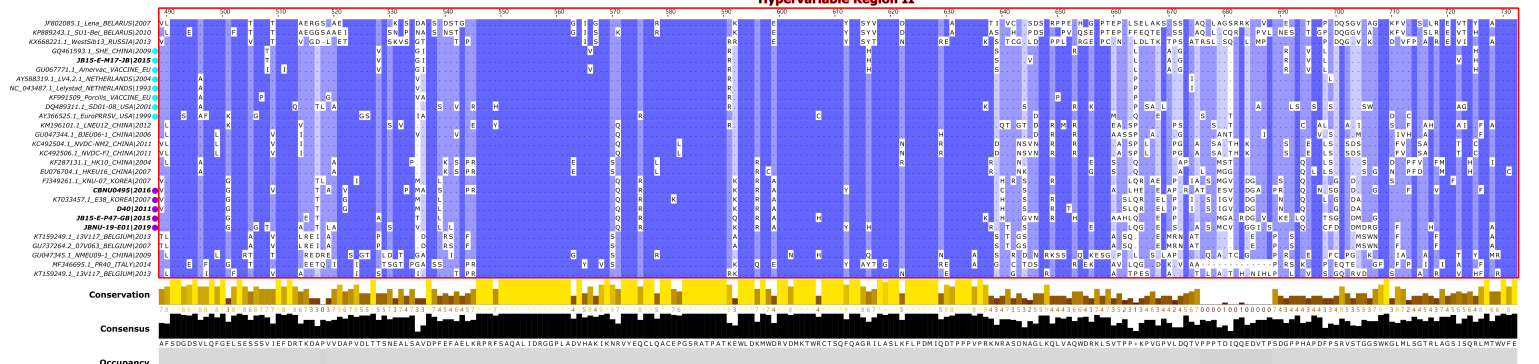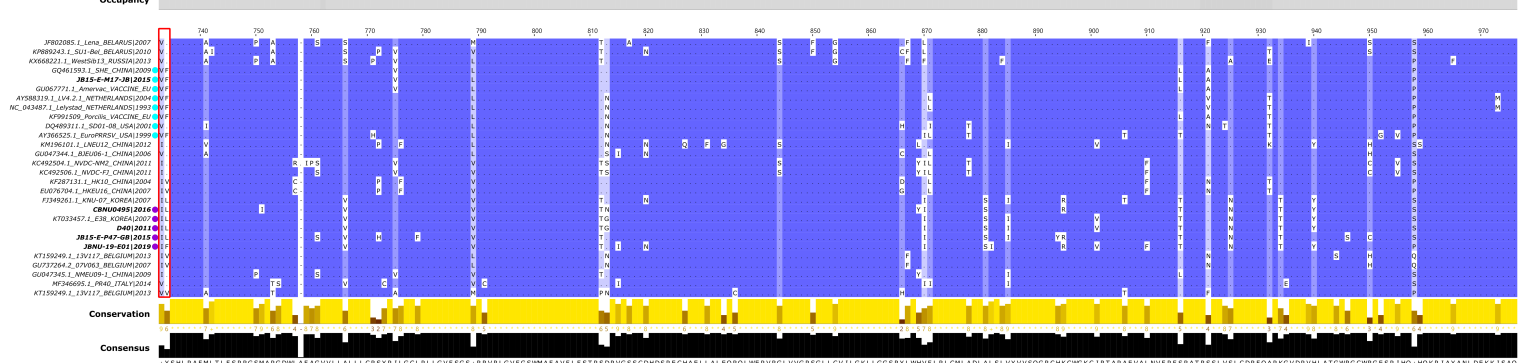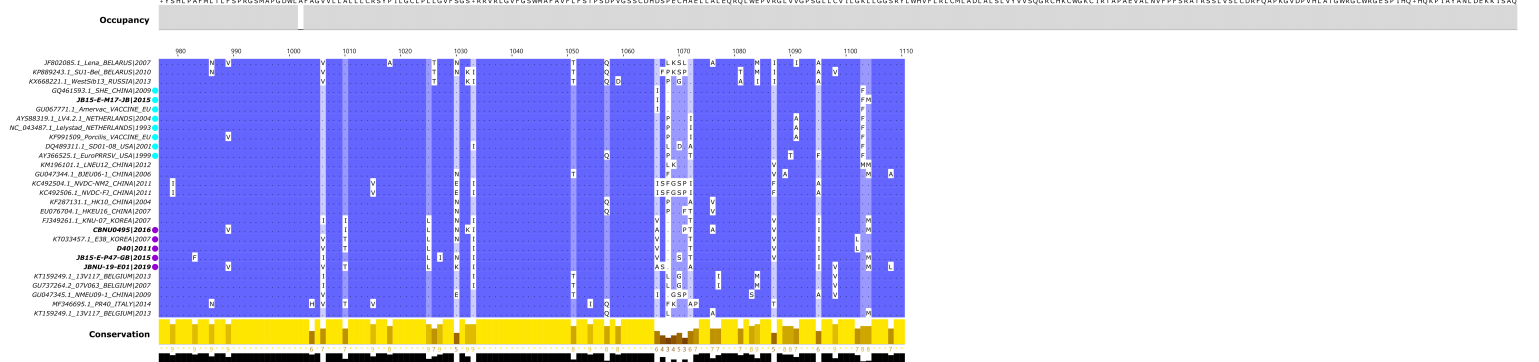

Supplement: MOESM8 [file 20302278]
