# Supplementary material for: Whole-genome sequencing and genetic characteristics of representative porcine reproductive and respiratory syndrome virus (PRRSV) isolates in Korea
Source: Springer Nature journal article supplement (doi:10.1186/s12985-022-01790-6), 2022-04-11

# PRRSV1 (EU) strains

## Amervac vs Kor PRRSV1

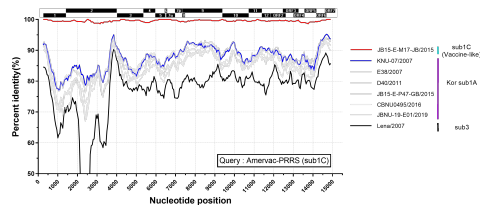

## KNU-07 vs Kor PRRSV1

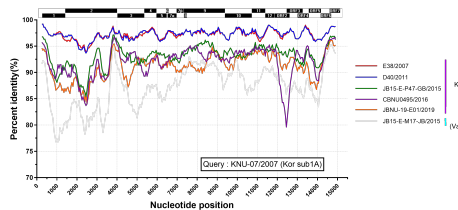

## CBNU0495 vs Kor PRRSV1

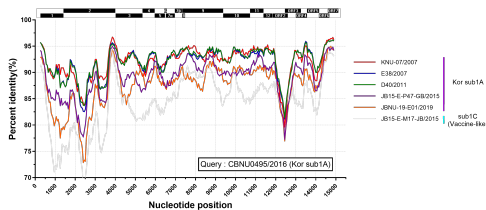

# PRRSV2 (NA) strains

## MLV (L5) vs Kor PRRSV2 L5

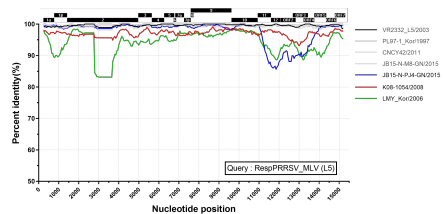

## MLV (L5) vs Kor PRRSV2

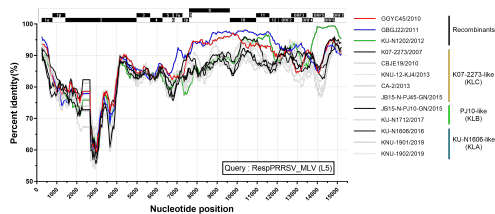

## NADC30(L1) vs Kor PRRSV2

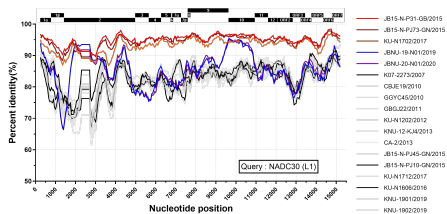

## NADC34(L1) vs Kor PRRSV2

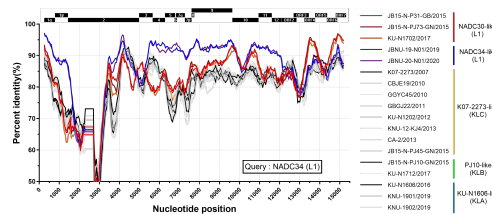

## K07-2273(KLC) vs Kor PRRSV2

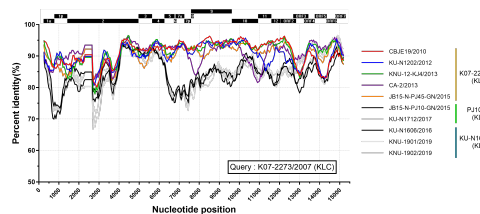

## 2015-N-PJ10-GN(KLB) vs Kor PRRSV2

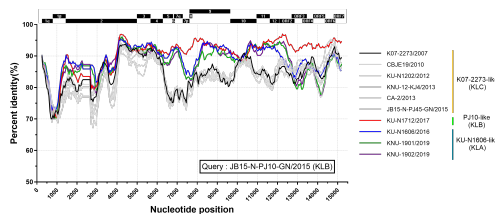

## KU-N1606(KLA) vs Kor PRRSV2

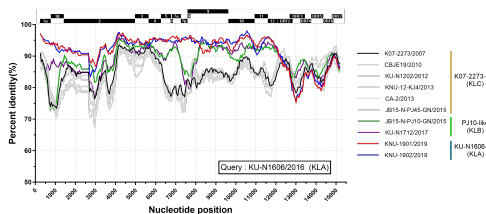

Supplement: MOESM10 [file 20302278]
